# Supplementary material
Source: Springer Nature journal article supplement (https://www.springermedizin.de/resource/supplementary/12885_2004_152_MOESM1_ESM.pdf/9469020)
Supplement: MOESM1 [file 9469020]

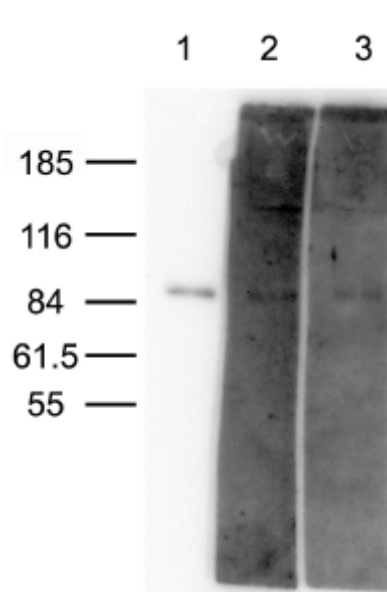

**Supplementary figure 1 – WESTERN Blot analysis confirming specificity of ELISA assay**

0.5  $\mu$ g per lane purified B-Raf was separated by SDS PAGE and blotted onto a nitrocellulose membrane. The membrane was blocked using dry milk and incubated with B-Raf specific monoclonal antibody 12S (lane 1; dilution 1:5000) or with serum from patient number #106 taken at 07.06. (see fig. 1B and C) which was strongly positive in the ELISA assay (lane 2, 3; dilution 1:200). Membranes were washed and bound antibodies were detected using horseradish peroxidase coupled sheep anti mouse total Ig antibody (Amersham) diluted 1:1000 (lane 1) or horseradish peroxidase coupled goat anti human total Ig antibody (Dianova) diluted 1:1000 (lane 2) or 1:3000 (lane 3) and the ECL detection kit (Amersham).
